# Supplementary material for: Formation Kinetics and Antimicrobial Activity of Silver Nanoparticle Dispersions Based on N-Reacetylated Oligochitosan Solutions for Biomedical Applications
Source: MDPI journal article supplement (doi:10.3390/pharmaceutics15122690), 2023-11-28
Supplement: s1 [file s1]

# Formation Kinetics and Antimicrobial Activity of Silver Nanoparticle Dispersions Based on N-Reacetylated Oligochitosan Solutions for Biomedical Applications

Ekaterina K. Urodskova <sup>1,\*</sup>, Ol'ga Ya. Uryupina <sup>1</sup>, Vladimir E. Tikhonov <sup>2</sup>, Natalia E. Grammatikova <sup>3</sup>, Anastasia V. Bol'shakova <sup>1</sup>, Anna A. Sinelshchikova <sup>1</sup>, Alexandra I. Zvyagina <sup>1</sup>, Dmitry N. Khmelenin <sup>4</sup>, Elena S. Zhavoronok <sup>5</sup> and Ivan N. Senchikhin <sup>1,\*</sup>

<sup>1</sup> A.N. Frumkin Institute of Physical Chemistry and Electrochemistry, Russian Academy of Sciences, 119071 Moscow, Russia; urupina635@mail.ru (O.Y.U.)

<sup>2</sup> A.N. Nesmeyanov Institute of Organoelement Compounds, Russian Academy of Sciences, 119991 Moscow, Russia; tikhon@ineos.ac.ru

<sup>3</sup> G.F. Gause Institute of New Antibiotics, 119021 Moscow, Russia; ngrammatikova@yandex.ru

<sup>4</sup> A.V. Shubnikov Institute of Crystallography, Russian Academy of Sciences, 119333 Moscow, Russia

<sup>5</sup> Lomonosov Institute of Fine Chemical Technologies, MIREA—Russian Technological University, 119571 Moscow, Russia

\* Correspondence: urodskovakatja@mail.ru (E.K.U.); isenchikhin@gmail.com (I.N.S.)

## Contents

Figure S1. Dependence of localized SPR peak maximum on inverse time.

Figure S2. SEM images of silver nanoparticles obtained by drying a drop of washed dispersion.

Table S1. PXRD qualitative analysis of samples.

Figure S3. EDX-spectra of initial OChT-12/24-R (*a*), initial OChT-12/25-R\* (*b*) and AgNPs dispersion based on OChT-12/24-R (*c*).

Figure S4. UV-visible spectrum of AgNPs dispersion based on OChT-12/25-R\*.

Figure S5. Particle size distributions of AgNPs dispersion based on OChT-12/25-R\*.

Figure S6. HRTEM images of AgNPs dispersion stabilized by OChT-12/25-R\*.

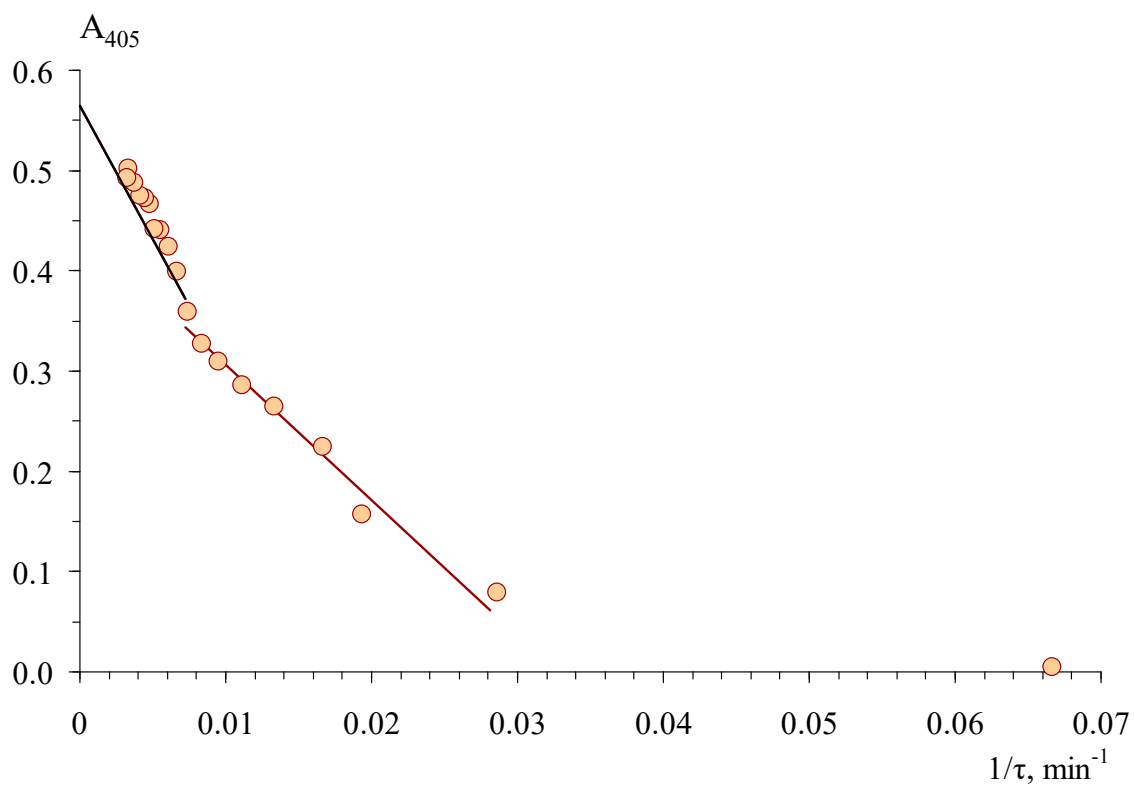

Figure S1. Dependence of LSPR peak maximum on inverse time.

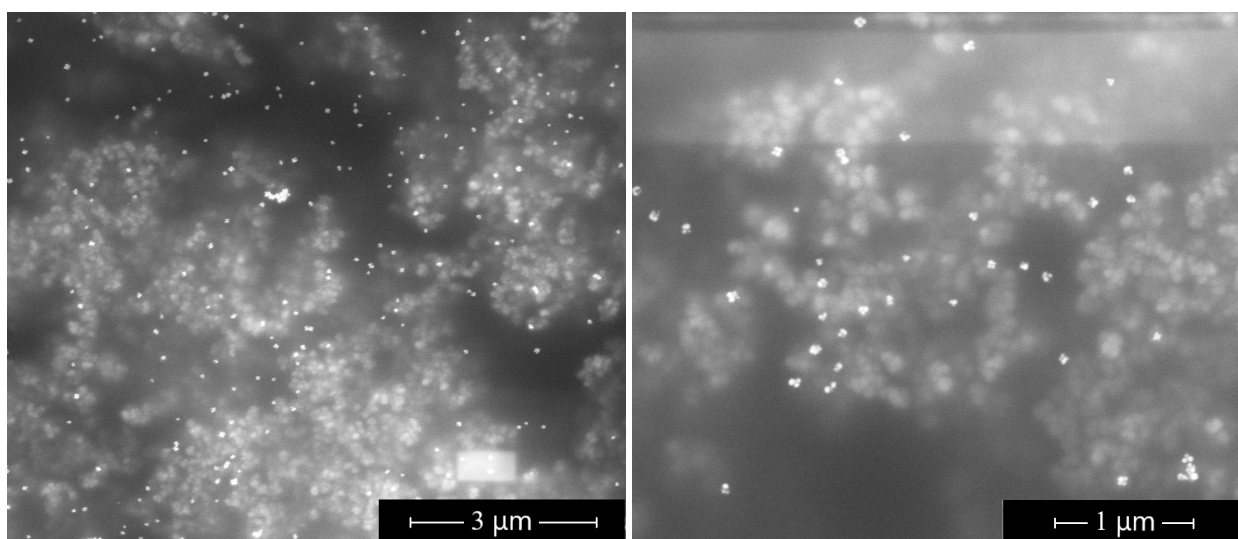

Figure S2. SEM images of silver nanoparticles obtained by drying a drop of washed dispersion on a silicon substrate.

Table S1. PXRD qualitative analysis of samples.

| Experiment        |                                                                |               | The most close phase (PDF2) |                 |                   |       |
|-------------------|----------------------------------------------------------------|---------------|-----------------------------|-----------------|-------------------|-------|
| $d$ , Å           | Presence of a peak in the experimental diffractogram / $I$ , % |               | Space group                 | Cell parameters | $d$ , Å / $I$ , % | $hkl$ |
|                   | OChT-12/24-R                                                   | OChT-12/25-R* |                             |                 |                   |       |
| Phase I (Fig. 6)  |                                                                |               | Fm3m                        | $a = 4.085$ Å   | Ag (4-783)        |       |
| 2.363             | + / 60                                                         | + / 100       |                             |                 | 2.332 / 100       | 111   |
| 2.048             | + / 16                                                         | + / 18        |                             |                 | 2.019 / 45        | 200   |
| 1.446             | + / 15                                                         | + / 20        |                             |                 | 1.428 / 20        | 220   |
| 1.233             | + / 17                                                         | + / 28        |                             |                 | 1.218 / 22        | 311   |
| Phase II (Fig. 6) |                                                                |               | Fm3m                        | $a = 5.549$ Å   | AgCl (31-1238)    |       |
| 3.210             | + / 46                                                         | —             |                             |                 | 3.200 / 50        | 111   |
| 2.780             | + / 100                                                        | —             |                             |                 | 2.770 / 100       | 200   |
| 1.965             | + / 52                                                         | —             |                             |                 | 1.962 / 60        | 220   |
| 1.675             | + / 13                                                         | —             |                             |                 | 1.670 / 18        | 311   |

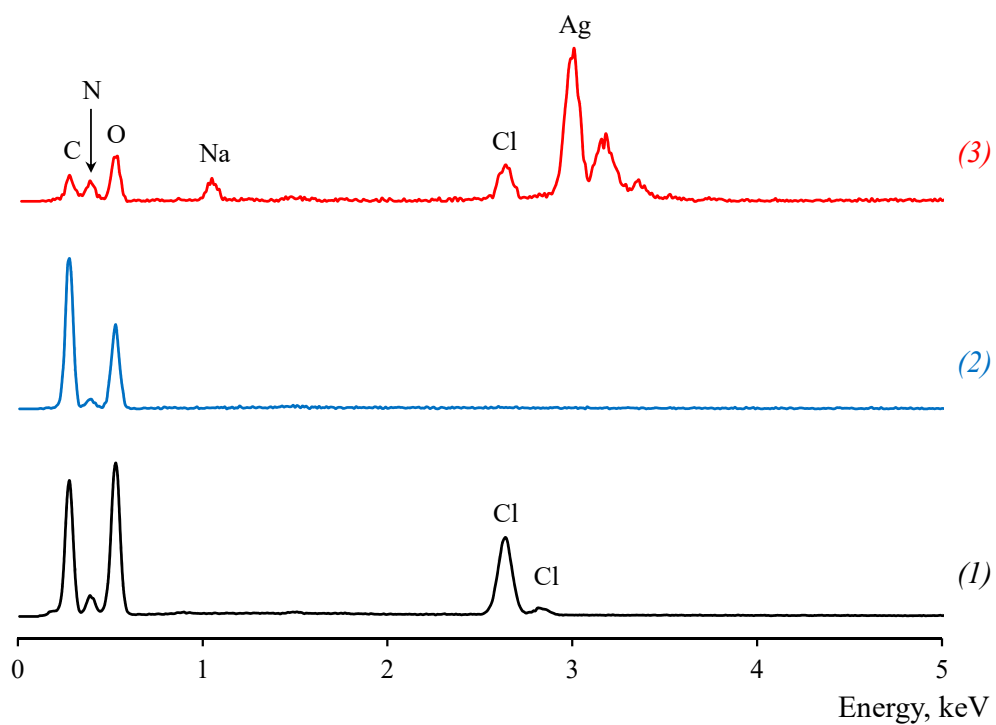

Figure S3. EDX-spectra of initial OChT-12/24-R (1), initial OChT-12/25-R\* (2) and AgNPs dispersion based on OChT-12/24-R (3).

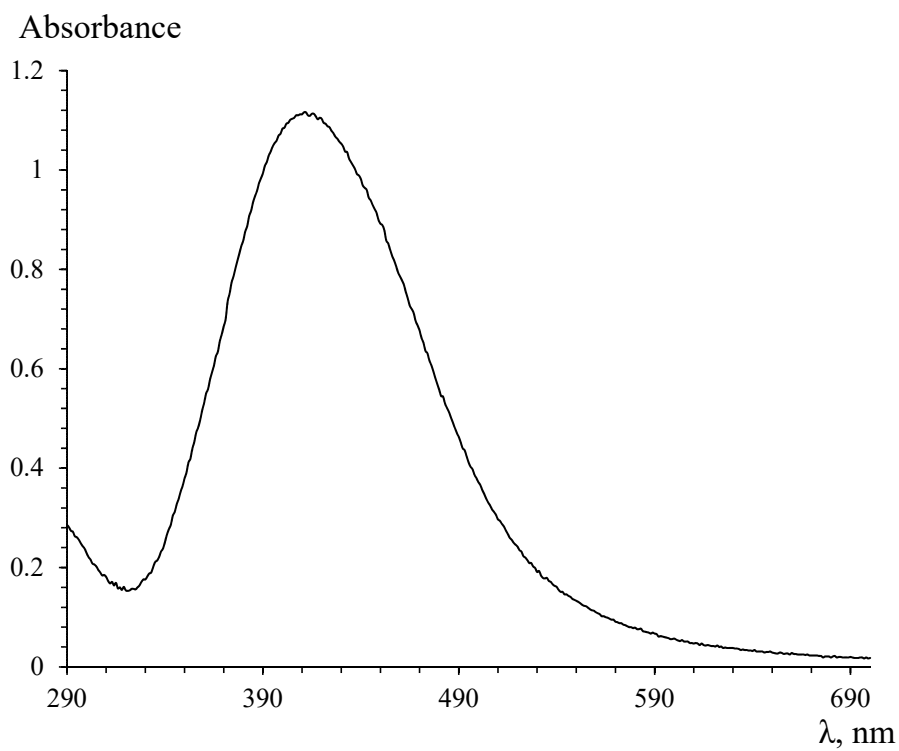

Figure S4. Typical UV-visible spectrum of dispersion based on OChT-12/25-R\*.

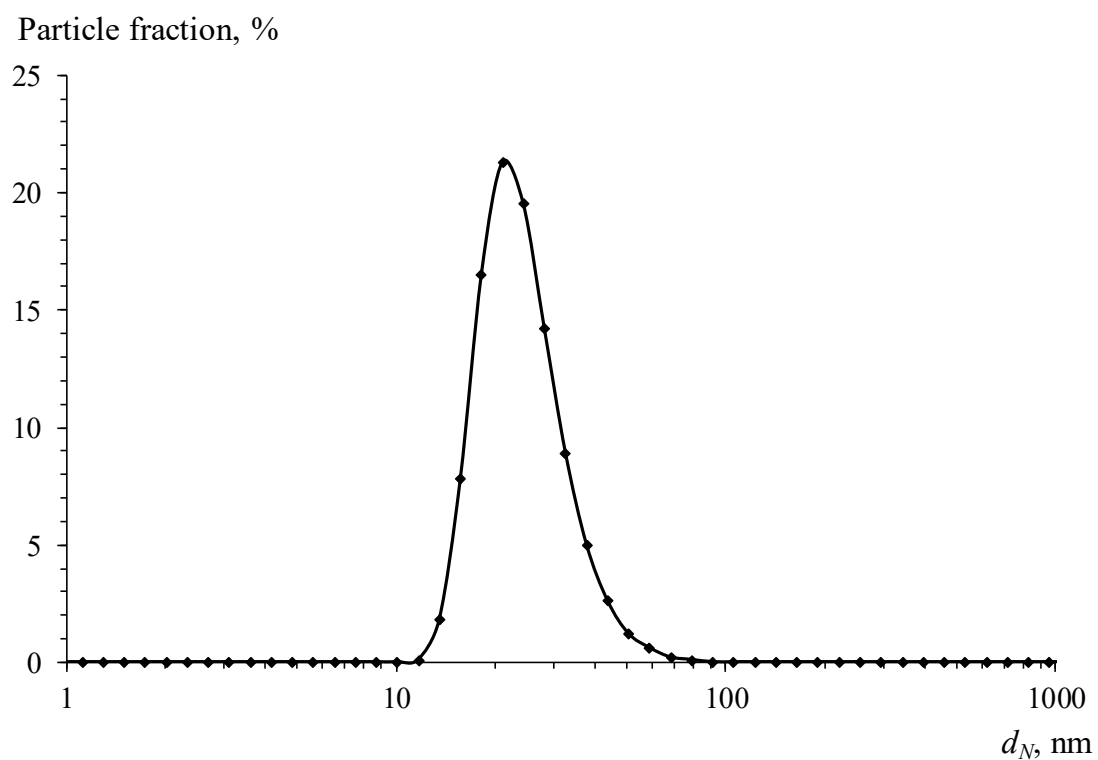

Figure S5. Typical particle size distributions of dispersion based on OChT-12/25-R\*.

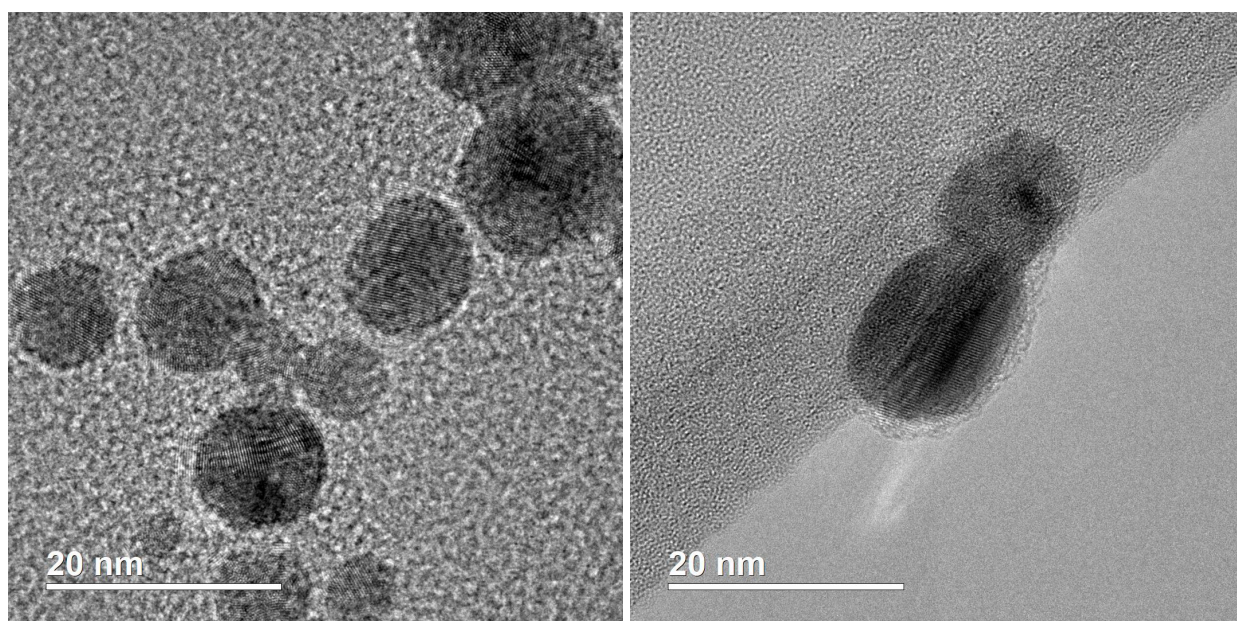

Figure S6. HRTEM images of dispersion stabilized by OChT-12/25-R\*.
